# Supplementary material for: Evidence for the Feedback Role of Performance Measurement Systems
Source: Atypon-hosted journal article supplement (doi:10.1287/mnsc.2018.3129), 2019-06-04
Supplement: mnsc.2018.3129.sm1.pdf [file mnsc.2018.3129.sm1.pdf]

**ONLINE APPENDIX**

**Table A-1: Descriptive Statistics for Teacher-level Analysis**

This table contains descriptive statistics for variables used in the teacher-level analysis. The ‘Between schools’ rows provide descriptive statistics for the 30 school-level means and provides insight into how schools differ. The ‘Within schools’ rows provide descriptive statistics for: (teacher value) – (school-level mean) + (overall mean) and provides insight into how teachers differ within a school. The data indicate significant variation in performance and in portal use both within and between schools; however, for all measures there is greater variation among teachers within a school than there is between schools.

|                                              | <b>MEAN</b> | <b>STD DEV</b> | <b>MIN</b> | <b>MAX</b> |
|----------------------------------------------|-------------|----------------|------------|------------|
| <b>Dependent Variable (N) <sup>(a)</sup></b> |             |                |            |            |
| Median mathsgp (505)                         |             |                |            |            |
| Overall                                      | 50.0        | 15.3           | 25.5       | 78.0       |
| Between schools                              |             | 5.6            | 40.4       | 61.9       |
| Within schools                               |             | 14.2           | 15.5       | 83.5       |
| Median elasgp (509)                          |             |                |            |            |
| Overall                                      | 50.6        | 14.3           | 25.0       | 76.5       |
| Between schools                              |             | 8.6            | 38.8       | 74.5       |
| Within schools                               |             | 12.7           | 18.6       | 88.3       |
| 25% mathsgp (505)                            |             |                |            |            |
| Overall                                      | 32.6        | 15.1           | 11.0       | 64.0       |
| Between schools                              |             | 5.5            | 23.1       | 45.9       |
| Within schools                               |             | 14.2           | 1.6        | 69.5       |
| 25% elasgp (509)                             |             |                |            |            |
| Overall                                      | 29.0        | 13.4           | 9.0        | 56.5       |
| Between schools                              |             | 8.9            | 17.3       | 56.5       |
| Within schools                               |             | 12.1           | -0.29      | 61.8       |
| 75% mathsgp (505)                            |             |                |            |            |
| Overall                                      | 68.0        | 14.0           | 41.0       | 91.0       |
| Between schools                              |             | 6.1            | 56.6       | 80.6       |
| Within schools                               |             | 12.9           | 31.9       | 102.4      |
| 75% elasgp (509)                             |             |                |            |            |
| Overall                                      | 71.9        | 12.5           | 45.0       | 91.0       |
| Between schools                              |             | 7.0            | 63.3       | 89.5       |
| Within schools                               |             | 11.3           | 40.6       | 99.6       |
| <b>Independent Variables</b>                 |             |                |            |            |
| Portal Use (625)                             |             |                |            |            |
| Overall                                      | 29.2        | 33.1           | 0.0        | 269.0      |
| Between schools                              |             | 11.2           | 9.0        | 50.7       |
| Within schools                               |             | 31.5           | -21.5      | 247.5      |
| Edusoft Use (625)                            |             |                |            |            |
| Overall                                      | 153.8       | 121.0          | 0.0        | 753.0      |
| Between schools                              |             | 75.4           | 41.1       | 341.9      |
| Within schools                               |             | 98.4           | -134.1     | 564.9      |

(a) 383 unique teachers, of whom 309 teach ELA and 314 teach math, are associated with 505 teacher-years of math and 509 teacher-years of ELA. Together these teachers are associated with 625 teacher-years of diagnostic tool use.

| VARIABLE NAME (N)           | MEAN | STD DEV | MIN  | MAX   |
|-----------------------------|------|---------|------|-------|
| <b>Control Variables</b>    |      |         |      |       |
| Teacher Effectiveness (251) |      |         |      |       |
| Overall                     | 87.5 | 16.0    | 11.0 | 100.0 |
| Between schools             |      | 8.76    | 69.5 | 99.0  |
| Within schools              |      | 13.7    | 20.6 | 115.4 |
| PctDisadv (638)             |      |         |      |       |
| Overall                     | 0.79 | 0.24    | 0.00 | 1.00  |
| Between schools             |      | 0.23    | 0.14 | 0.99  |
| Within schools              |      | 0.07    | 0.30 | 1.17  |
| PctEngonly (638)            |      |         |      |       |
| Overall                     | 0.48 | 0.30    | 0.00 | 1.00  |
| Between schools             |      | 0.29    | 0.04 | 0.88  |
| Within schools              |      | 0.08    | 0.16 | 0.70  |

**Variable definitions:**

[X]Mathsgp, [X]ELAsgp: the moments of the distribution of student SGP performance in math or ELA for all students taught by a teacher in a year, where [X] is Median, 25<sup>th</sup> percentile and 75<sup>th</sup> percentile  
The dependent variables are based on the moments of the distribution of student performance for students taught by a single teacher in a year. The distribution of students to teachers for a given subject and year is: For the 505 teacher-years of math performance, on average the distribution of math performance is based on 28.4 students (median 22, standard deviation 19.0, min 5.0, max 145.0)  
For the 509 teacher-years of ELA performance, on average the distribution of ELA performance is based on 27.3 students (median 22.0, standard deviation 15.1, min 5.0, max 100.0)  
Portal Use, Edusoft Use: the annual use of each data tool by the teacher for the school year  
Teacher Effectiveness: the average principal ratings that the teacher received in 2012-2013 and 2013-2014 (using a single year rating if there is only one). Missing teacher ratings reduce the sample from 383 unique teachers to 251 teachers when this variable is included.  
PctDisadv: percentage of the teacher’s students classified as disadvantaged for the school year  
PctEngonly: percentage of the teacher’s students classified as native English speakers for the school year

**Table A-2: Teacher-level Analysis excluding teacher effectiveness controls - OLS Regression of Median, 25<sup>th</sup> percentile and 75<sup>th</sup> percentile Student Growth**

Regression analysis of the association between median, 25<sup>th</sup> percentile and 75<sup>th</sup> percentile SGP performance for students taught by a teacher, and the teacher's use of PMSs. Untabulated fixed school effects (N=30 schools) are significant in both models. <sup>(a)</sup>

| <i>Independent Variable</i>   | <i>Predicted Sign</i> | <b>ELAsgp</b><br>N=509<br><i>Estimated coefficient</i><br><i>(t-statistic)</i> |                                   |                                   | <b>Mathsgp</b><br>N=505<br><i>Estimated coefficient</i><br><i>(t-statistic)</i> |                                   |                                   |
|-------------------------------|-----------------------|--------------------------------------------------------------------------------|-----------------------------------|-----------------------------------|---------------------------------------------------------------------------------|-----------------------------------|-----------------------------------|
|                               |                       | <b>Median</b>                                                                  | <b>25<sup>th</sup> percentile</b> | <b>75<sup>th</sup> percentile</b> | <b>Median</b>                                                                   | <b>25<sup>th</sup> percentile</b> | <b>75<sup>th</sup> percentile</b> |
| <b>Portal Use</b>             | (+)                   | 0.01<br>(0.77)                                                                 | 0.02<br>(1.17)                    | 0.03<br>(2.03) **                 | 0.06<br>(2.98) ***                                                              | 0.07<br>(3.38) ***                | 0.04<br>(2.32) **                 |
| <b>Edusoft Use</b>            | (+)                   | 0.02<br>(3.05) ***                                                             | 0.02<br>(3.68) ***                | 0.01<br>(2.76) ***                | 0.027<br>(4.30) ***                                                             | 0.03<br>(3.94) ***                | 0.02<br>(3.78) ***                |
| <b>PctEngonly</b>             |                       | -18.1<br>(-2.62) ***                                                           | -12.9<br>(-1.81) *                | -11.2<br>(-1.83) *                | -11.7<br>(-1.59)                                                                | -8.05<br>(-1.09)                  | -11.2<br>(-1.64)                  |
| <b>PctDisadv</b>              |                       | -7.05<br>(-0.83) *                                                             | -12.6<br>(-1.63)                  | -12.1<br>(-1.77) *                | 4.84<br>(0.62)                                                                  | 0.72<br>(0.08)                    | 11.4<br>(1.5)                     |
| <b>Adjusted R<sup>2</sup></b> |                       | 0.17                                                                           | 0.14                              | 0.14                              | 0.15                                                                            | 0.13                              | 0.15                              |

\*\*\*, \*\*, \* p-value  $\leq 0.01, 0.05, 0.10$  in one-tailed test of significance for independent variables and two-tailed test for controls.

(a) In untabulated results of maximum likelihood estimation of a two-level model with random school effects, school-level variation (i.e., rho) explains 15, 13, 11 percent of 25<sup>th</sup> percentile, median, 75<sup>th</sup> percentile *ELAsgp* variation and 8, 7, 9 percent of 25<sup>th</sup> percentile, median, 75<sup>th</sup> percentile *Mathsgp* variation.

Figure A-1:  
Examples of Visual Presentation of Student Performance and Improvement in the Data Portal

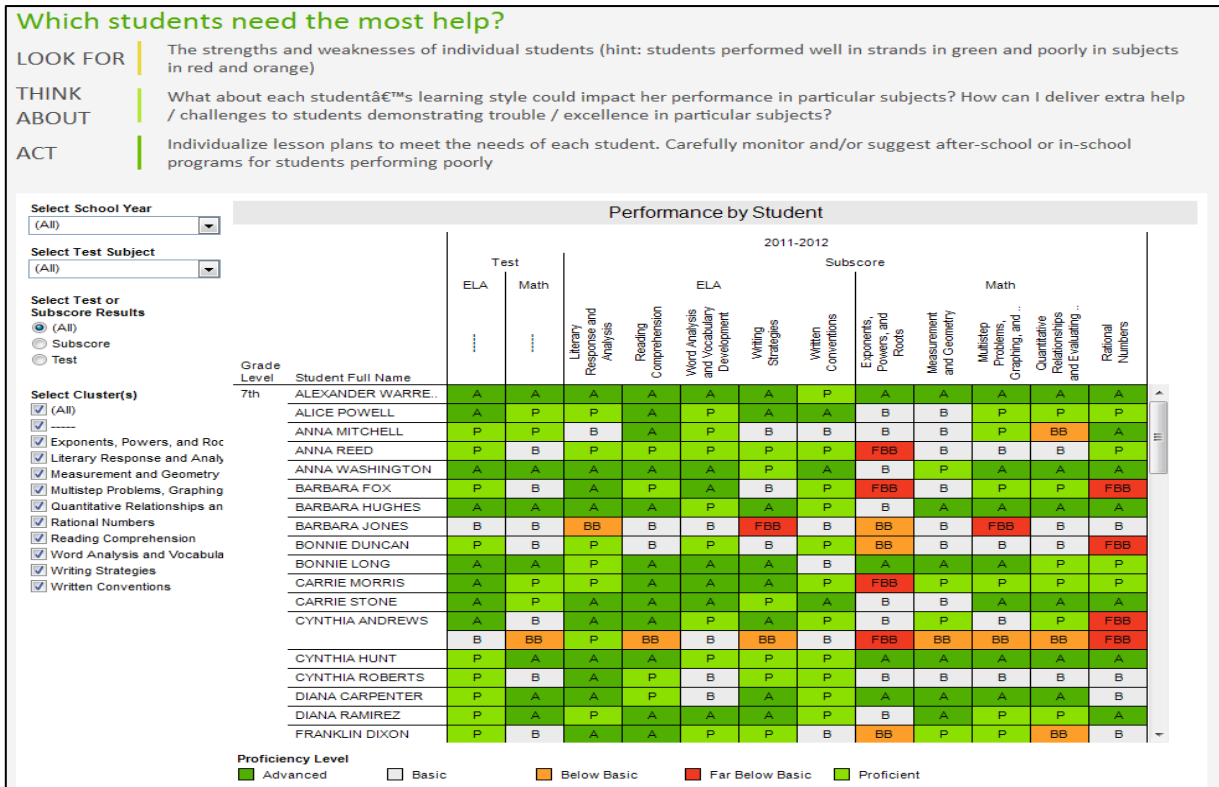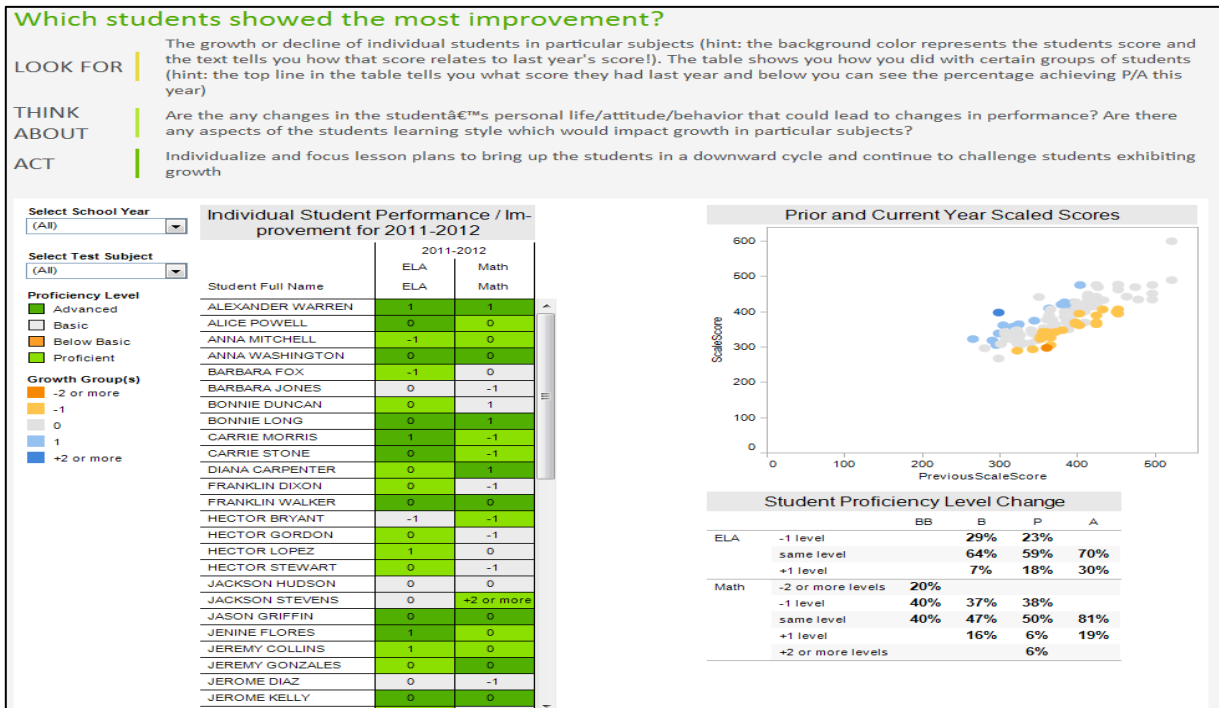

Source: Schoolzilla.org

Note: All data presented are fictitious and for purposes of illustration only.
